# Supplementary material for: Natural Genetic Variation in Selected Populations of Arabidopsis thaliana Is Associated with Ionomic Differences
Source: PubMed Central journal article supplement (PMC2885407; doi:10.1371/journal.pone.0011081), 2010-06-14

**Li7**

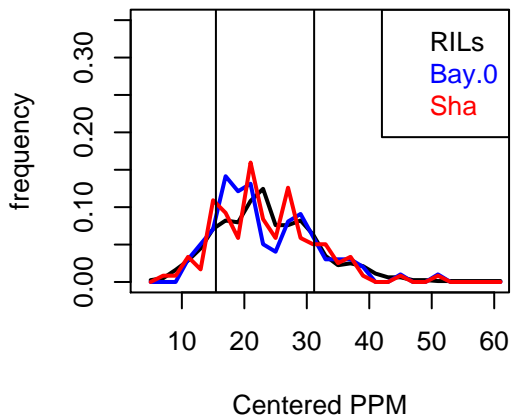

**B11**

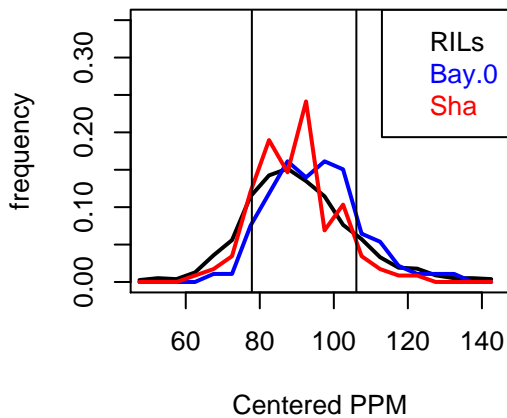

**Na23**

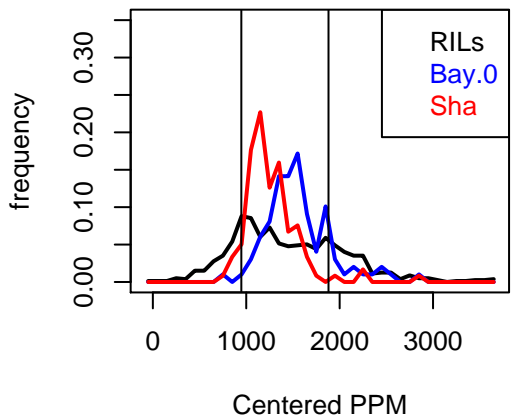

**Mg25**

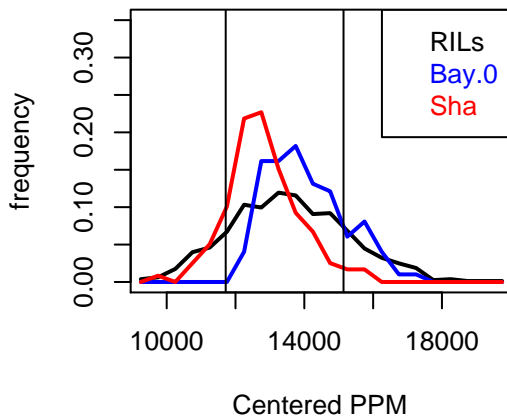

**P31**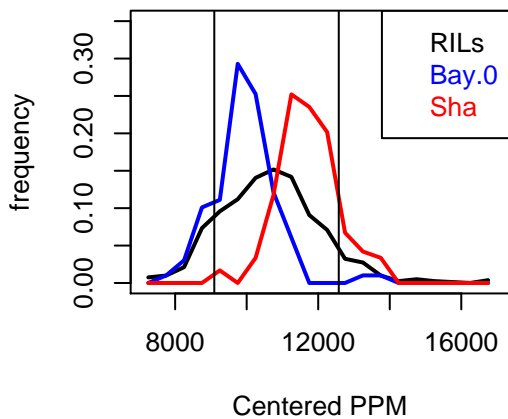**S34**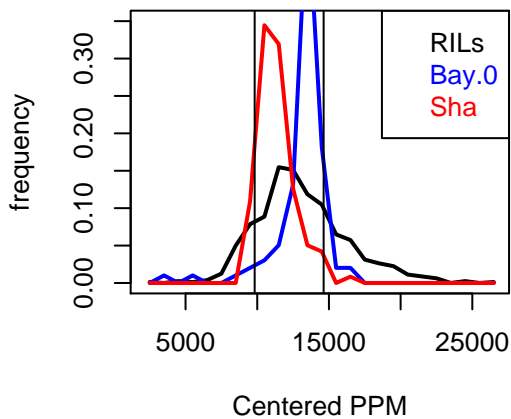**K39**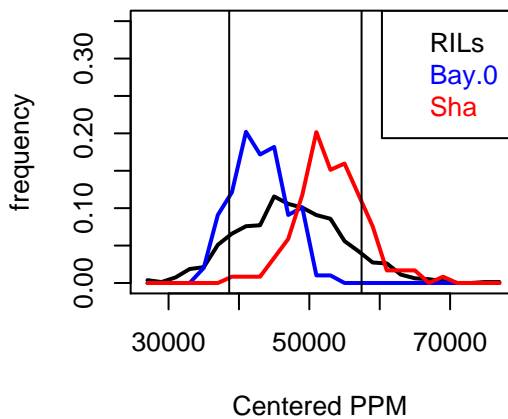**Ca43**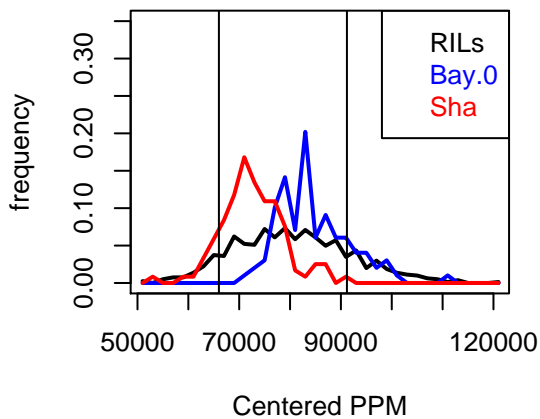

**Mn55**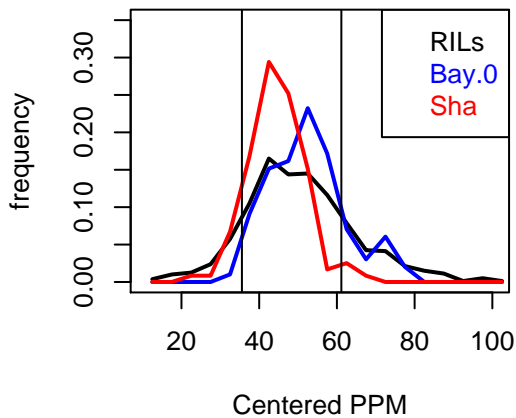**Fe57**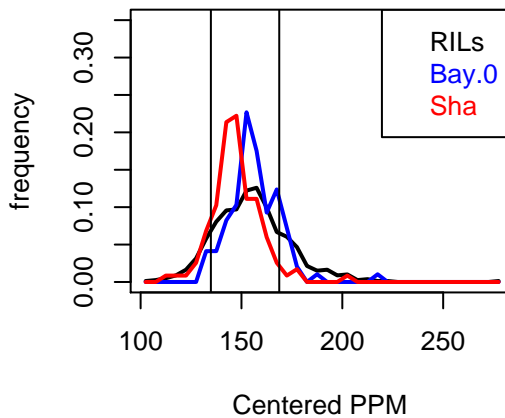**Co59**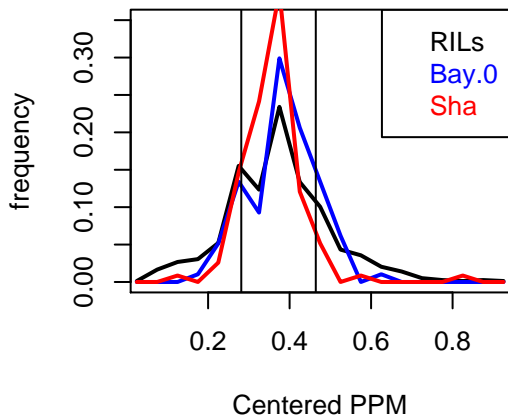**Ni60**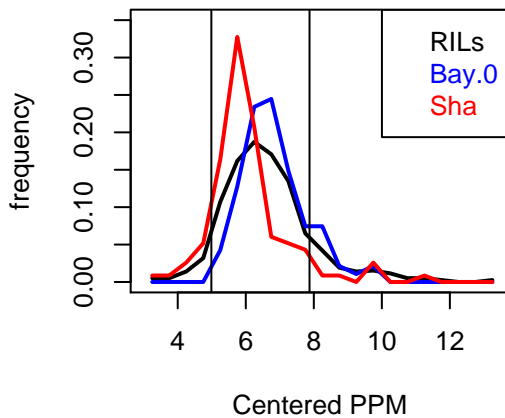

**Cu65**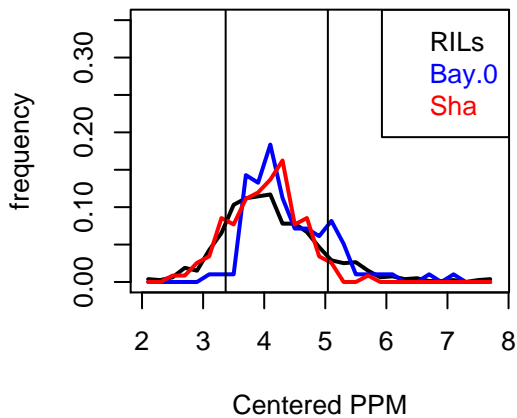**Zn66**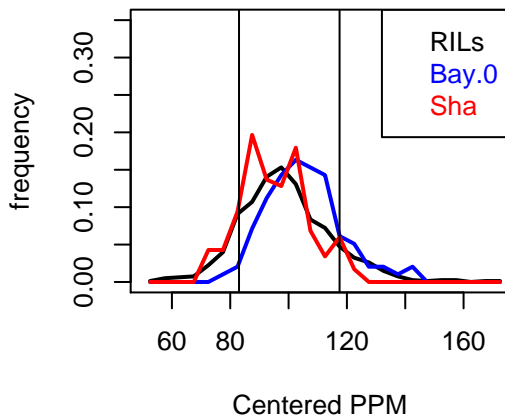**As75**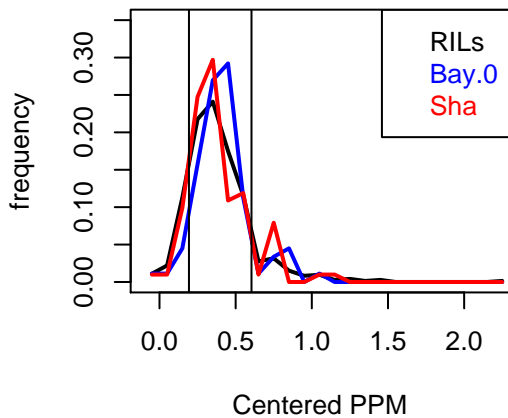**Se82**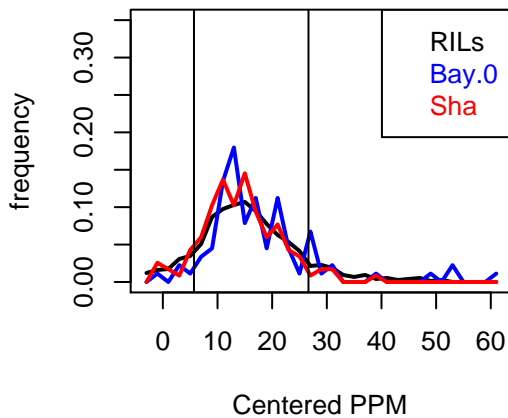

**Rb85**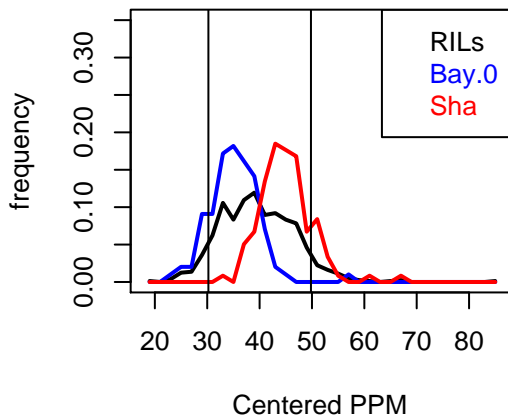**Mo98**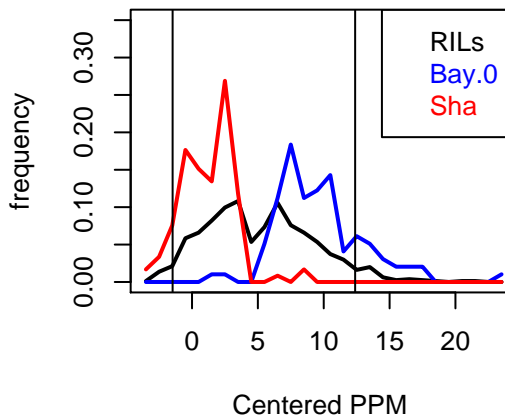**Cd114**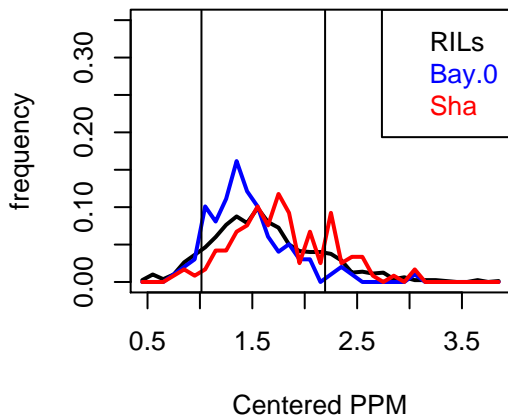

Supplement: pone.0011081.s007.pdf [file pone.0011081.s007.pdf]
