# Supplementary material for: Natural Genetic Variation in Selected Populations of Arabidopsis thaliana Is Associated with Ionomic Differences
Source: PubMed Central journal article supplement (PMC2885407; doi:10.1371/journal.pone.0011081), 2010-06-14

### Li7

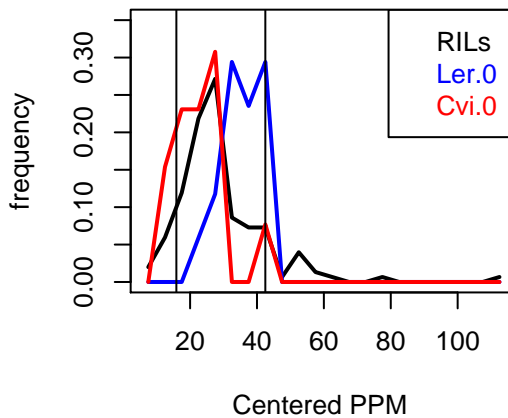

### B11

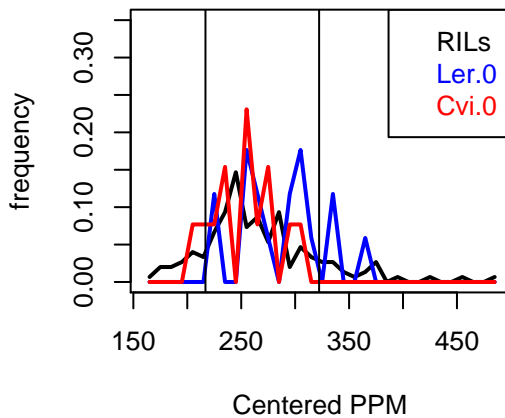

### Na23

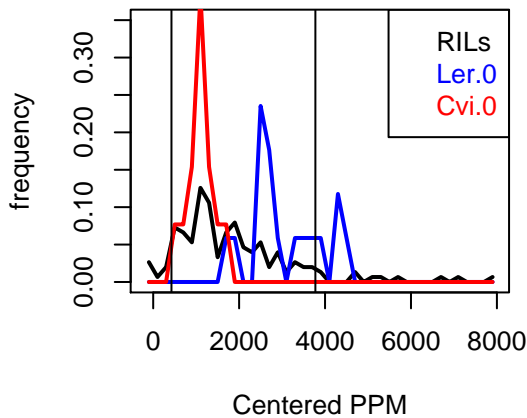

### Mg25

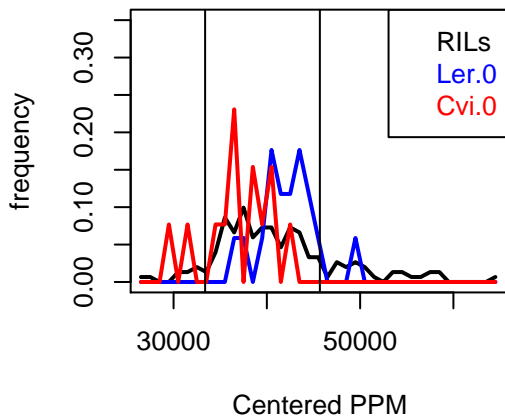

**P31**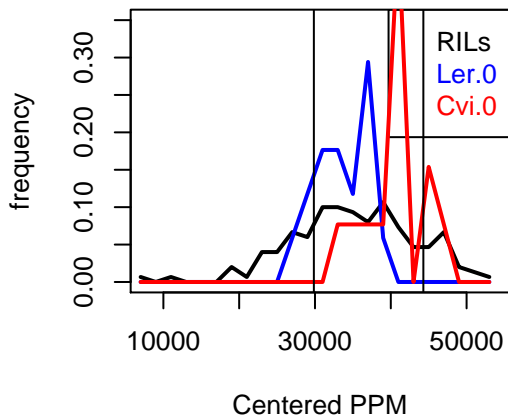**K39**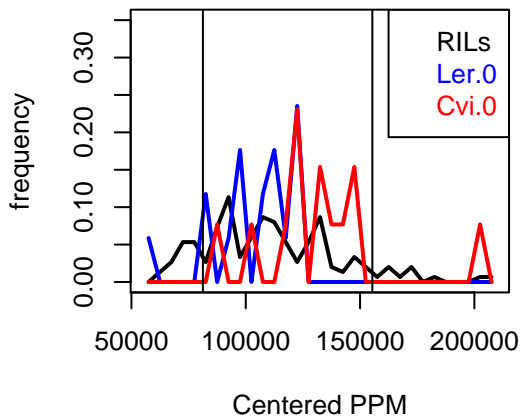**Ca43**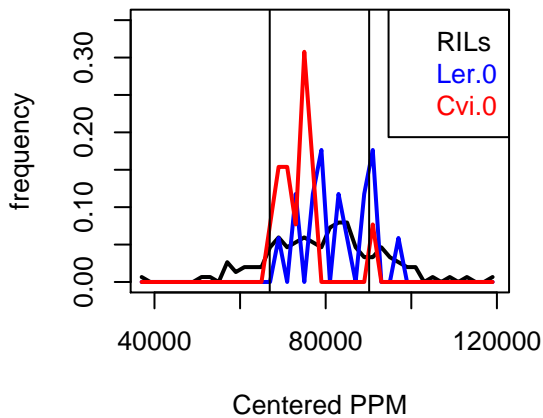**Mn55**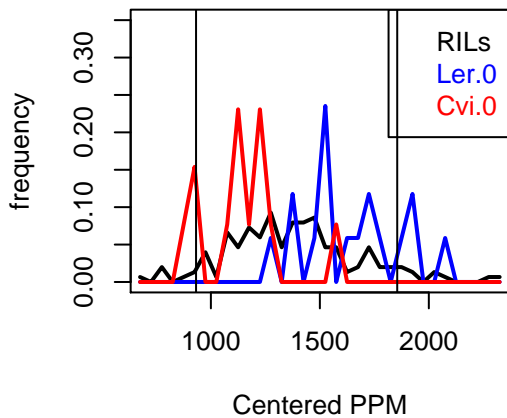

**Fe56**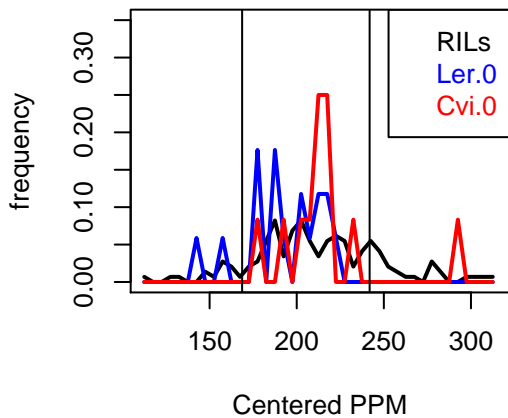**Co59**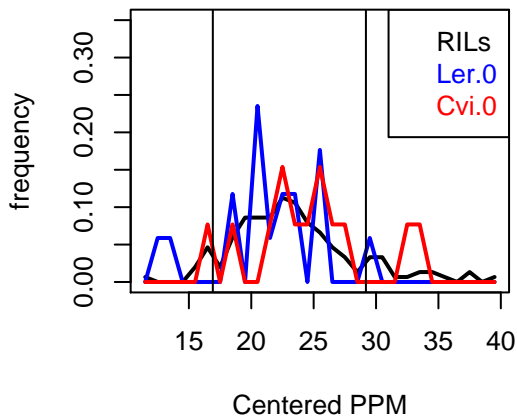**Ni60**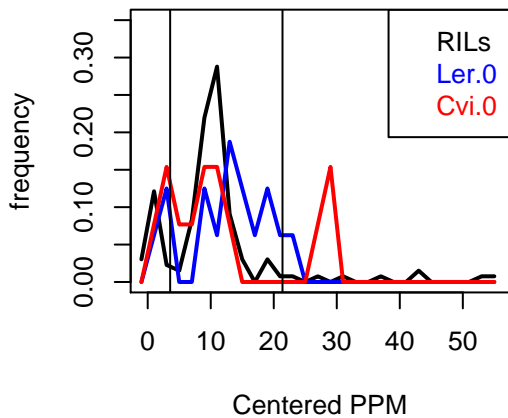**Cu65**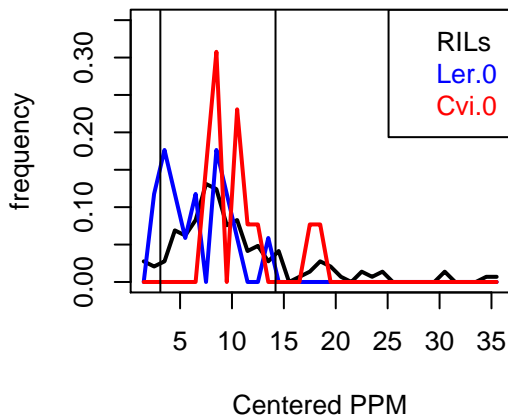

### Zn66

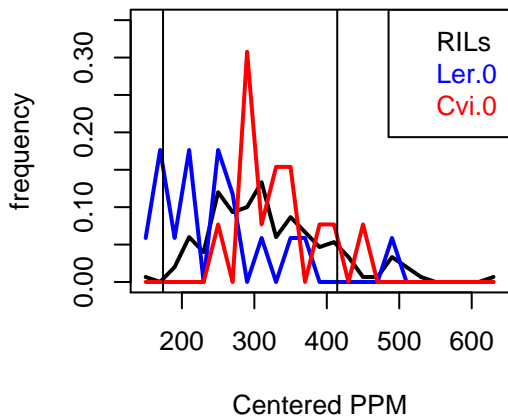

### As75

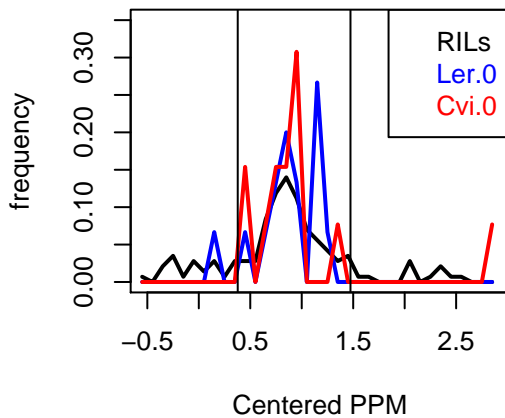

### Se77

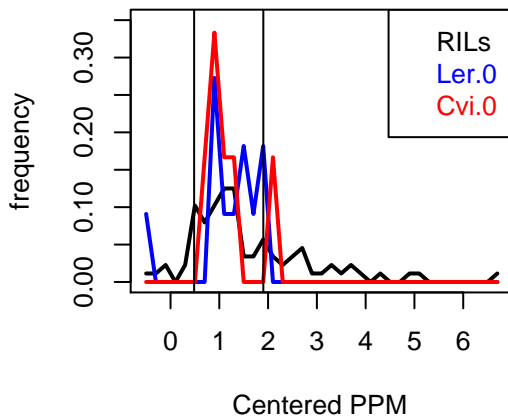

### Mo95

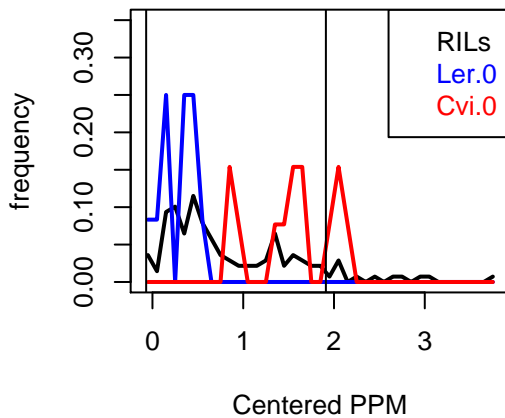

# Cd111

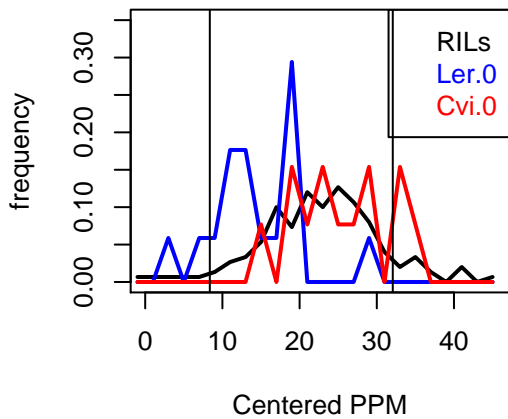

Supplement: pone.0011081.s009.pdf [file pone.0011081.s009.pdf]
